# MIND TO MIND

*Creative writing that explores the abstract side  
of our profession and our lives*

*Carol Wiley Cassella, M.D., Editor*

## **Anesthesiology: An Art or a Science?**

Rakhee Goyal, M.D.\*

**A** *A science of laws of physics— the motion  
of gases,  
of constrict and expand.  
Theories of heat and pressure,  
dilate and contract.  
A stitch of needles and threads, often  
in acid excess.  
Volumes of breath, more  
or less.  
Power of flows, highs  
or lows.  
Choice of dextro and levo, same  
yet de novo.  
A science of alpha and beta, support  
or oppose.  
A medley of surge  
and collapse.  
An art of magic,  
the magic of thought,  
the thought of fusion,  
the fusion of heart and soul.  
The balance of  
depth and light, more and less  
of pain and joy, give  
or lose.  
A play of safe,  
of touch and numb, for all  
or some.  
A dream of life,  
a sketch of real.*

\* Armed Forces Medical College, Pune and Command Hospital (SC), Pune, India. rakhee\_goyal@yahoo.co.in

Accepted for publication December 21, 2012.

Copyright © 2013, the American Society of Anesthesiologists, Inc. Lippincott Williams & Wilkins. Anesthesiology 2013; 119:482
